# Supplementary material for: A rGO–DNAzyme assisted fluorescence method for sensitive RNase A activity assay and natural compound screening
Source: Royal Society of Chemistry journal article supplement (doi:10.1039/d1ay01053k), 2021-01-01

## Supplementary Material

### rGO-DNAzyme assisted fluorescence method for sensitive RNase A activity assay and natural compounds screening

Yan Qin<sup>1#,2</sup>, Ying Long<sup>1#</sup>, Ting Zhou<sup>1#</sup>, Ruxin Luo<sup>1</sup>, Chunyi Tong<sup>1</sup>, Qian Xie<sup>2</sup>, Wei Wang<sup>2\*</sup>, Bin Liu<sup>1\*</sup>

<sup>1</sup>College of Biology, Hunan University, Changsha, 410082, P. R China

<sup>2</sup>TCM and Ethnomedicine Innovation & Development International Laboratory, Innovative Material Medical Research Institute, School of Pharmacy, Hunan University of Chinese Medicine, Changsha, 410208, P. R China

# These authors contributed to the work equally and should be regarded as co-first authors.

To whom correspondence should be addressed. Tel: +86-731-89720939; Fax: +86-731-89720939; E-mail:

[binliu2001@hotmail.com](mailto:binliu2001@hotmail.com) (B. Liu); [wangwei402@hotmail.com](mailto:wangwei402@hotmail.com) (W. Wang).

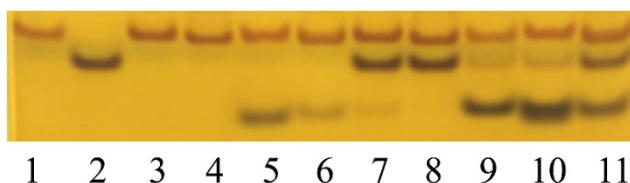

**Fig. S1.** Native PAGE gel (15%) for RNase A assay. Lane1:DNAzyme1; Lane2:P1; Lane3: S1; Lane4: S2; Lane5: S1+RNase A; Lane6: S2+RNase A; Lane7:S1+P1; Lane8: S2+P1.Lane 9: DNAzyme1+P1; Lane 10: S1+RNase A+P1; Lane11: S2+RNase A+P1.

[S1] = [S2] = [DNAzyme1] = [P1] = 100 nM, [RNase A] = 4 ng/ $\mu$ L. [rGO]= 7  $\mu$ g/mL.

**Table S1.** The sequences of oligonucleotide strands

| Name     | Sequences (5'-3')                                 |
|----------|---------------------------------------------------|
| DNAzyme1 | CAT CTC TTC TCC GAG CCG GTC GAA ATA rU            |
| P1       | FAM-TAT rAGG AAG AGA TG                           |
| S1       | CAT CTC TTC TCC GAG CCG GTC GAA ATA rUAA GAG ATG  |
| S2       | CAT CTC TTC TCC GAG CCG GTC GAA ATA rUGA AGA GATG |

**Table S2.** Information of natural drugs

| Code | Molecular Formula | Name                      | Structure                                                                             |
|------|-------------------|---------------------------|---------------------------------------------------------------------------------------|
| B1   | $C_{27}H_{34}O_8$ | Isovaleroybinankadsurin A | 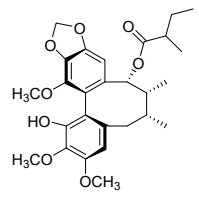   |
| B2   | $C_{27}H_{34}O_8$ | Kadsuralignan J           |    |
| B3   | $C_{27}H_{32}O_8$ | Kadsuralignan I           |   |
| B4   | $C_{27}H_{36}O_8$ | Kadsuralignan L           |  |
| B5   | $C_{26}H_{32}O_8$ | Heilaohulignan A          |  |
| B6   | $C_{27}H_{32}O_8$ | Heilaohulignan C          |  |
| B7   | $C_{25}H_{30}O_8$ | Longipedunin B            |  |

B8

$C_{27}H_{30}O_8$

Schiarianrin E

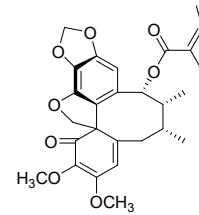

B9

$C_{27}H_{34}O_8$

Schisantherin F

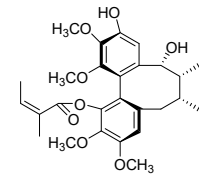

CS1

$C_{26}H_{34}O_6$

Cinobufagin

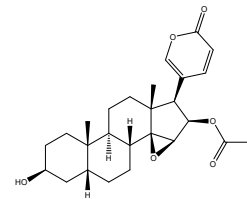

CS2

$C_{24}H_{32}O_4$

Recibufogenin

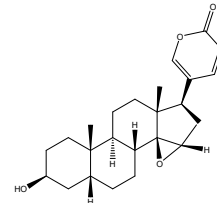

CS3

$C_{24}H_{32}O_6$

Arenobufagin

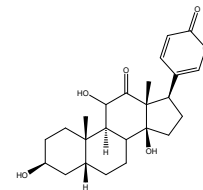

CS4

$C_{24}H_{34}O_4$

Bufalin

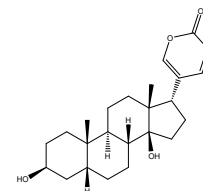

CS5

$C_{26}H_{36}O_6$

Bufotaline

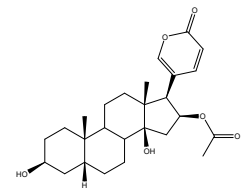

CS6

$C_{24}H_{34}O_5$

Gamabufotalin

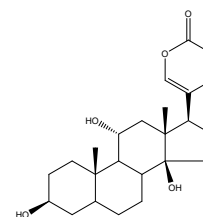

Supplement: d1ay01053k1.pdf [file d1ay01053k1.pdf]
